# Supplementary material for: Structural signatures of antibiotic binding sites on the ribosome
Source: PubMed Central journal article supplement — Nucleic Acids Res. 2010 May 21;38(18):5982–94. doi: 10.1093/nar/gkq411 (PMC2952860; doi:10.1093/nar/gkq411), 2010-05-21
Supplement: supp_gkq411_Sup_tables_HDE.pdf [file supp_gkq411_Sup_tables_HDE.pdf]

## Supplementary Tables

**Table S1:** Calibration of the small probe radius.

| Index<br>Small probe<br>radius (Å) | 2           | 3           | 4           | 11          | 12          | 13          | 23          | 26          | 32          | 35          | 36          |
|------------------------------------|-------------|-------------|-------------|-------------|-------------|-------------|-------------|-------------|-------------|-------------|-------------|
| <b>1.50</b>                        | <b>0.59</b> | <b>1.72</b> | <b>0.42</b> | <b>0.74</b> | <b>1.75</b> | <b>0.90</b> | <b>0.70</b> | <b>1.46</b> | <b>0.68</b> | <b>0.47</b> | <b>1.10</b> |
| 2.50                               | 5.74        | 1.72        | 1.14        | 0.74        | 2.23        | 1.14        | 0.72        | 1.46        | 0.39        | 0.47        | 1.10        |
| 3.50                               | 7.05        | 2.40        | 2.39        | 6.74        | 3.41        | 1.47        | 0.72        | 4.81        | 0.39        | 0.47        | 0.62        |
| 4.50                               | 7.05        | 2.61        | 2.39        | 8.80        | 3.77        | 7.67        | 0.72        | 4.98        | 1.41        | 0.47        | 5.01        |
| 5.50                               | 8.46        | 2.61        | 2.39        | 20.04       | 4.49        | 9.18        | 2.11        | 8.13        | 2.53        | 10.50       | 11.49       |
| 6.50                               | 12.42       | 13.83       | 7.51        | 20.08       | 22.45       | 15.78       | 3.94        | 9.54        | 5.77        | 10.54       | 12.57       |
| 7.50                               | 14.22       | 15.05       | 48.12       | 20.08       | 32.30       | 21.46       | 47.02       | 45.25       | 46.52       | 47.36       | 45.05       |
| 8.50                               |             |             |             |             |             |             | 66.58       | 62.85       | 61.70       | 48.11       | 52.80       |

Distances (Å) between known ABS to the closest computed binding pocket (background) as a function of the small and large probe radii (PDB IDs 1J5E and 1JJ2) are presented. Indices refer to the ribosome complexes listed in Table 1. The large probe radius was fixed to 9.5 Å. We consider a change in a distance equal or above 1 Å as significant. A small probe radius of 1.5 Å was chosen since a minimal distance between known ABSs and computed pockets was reached.

**Table S2:** Calibration of the large probe radius.

| Index<br>Large | 2           | 3           | 4           | 11          | 12          | 13          | 23          | 26          | 32          | 35          | 36          |
|----------------|-------------|-------------|-------------|-------------|-------------|-------------|-------------|-------------|-------------|-------------|-------------|
| 9.50           | 0.59        | 1.72        | 0.42        | 0.74        | 1.75        | 0.90        | 0.70        | 1.46        | 0.68        | 0.47        | 1.10        |
| 8.50           | 0.59        | 1.72        | 0.42        | 0.74        | 1.75        | 0.90        | 0.70        | 1.46        | 0.68        | 0.47        | 1.10        |
| 7.50           | 0.59        | 1.72        | 0.42        | 0.74        | 1.75        | 0.90        | 0.70        | 1.46        | 0.68        | 0.47        | 1.10        |
| 6.50           | 0.59        | 1.72        | 0.42        | 0.74        | 1.75        | 0.90        | 0.70        | 1.46        | 0.68        | 0.47        | 1.10        |
| <b>5.50</b>    | <b>0.59</b> | <b>1.79</b> | <b>0.42</b> | <b>0.74</b> | <b>1.75</b> | <b>0.90</b> | <b>0.70</b> | <b>1.46</b> | <b>0.68</b> | <b>0.47</b> | <b>1.10</b> |
| 4.50           | 0.59        | 1.79        | 0.42        | 0.74        | 1.75        | 0.90        | 1.24        | 1.46        | 0.68        | 1.43        | 1.10        |
| 3.50           | 0.59        | 2.03        | 0.42        | 0.74        | 1.75        | 0.90        | 1.90        | 1.46        | 1.14        | 2.53        | 2.56        |
| 2.50           | 0.59        | 2.55        | 0.42        | 5.83        | 3.59        | 8.21        | 3.09        | 3.08        | 2.79        | 5.47        | 3.23        |

Distances (Å) between known ABS to the closest computed binding pocket (background) as a function of the large probe radii (PDB IDs 1J5E and 1JJ2) are presented. Indices refer to the ribosome complexes listed in Table 1. The small probe radius was fixed to 1.5 Å according to Table S1. We consider a change in a distance equal or above 1 Å as significant. A large probe radius of 5.5 Å was chosen since a minimal distance between known ABSs and computed pockets was reached.

**Table S3:** Size of computed binding pocket as a function of the radius from a computed center of mass.

| Index   | Size of known binding site [number of nts] | Size of the closest computed pocket [number of nts] |        |        |        |              |         |
|---------|--------------------------------------------|-----------------------------------------------------|--------|--------|--------|--------------|---------|
|         |                                            | R= 5 Å                                              | R= 6 Å | R= 7 Å | R= 8 Å | R= 9 Å       | R= 10 Å |
| 2       | 9                                          | 3                                                   | 5      | 7      | 10     | 14           | 14      |
| 3       | 11                                         | 1                                                   | 7      | 9      | 10     | 11           | 14      |
| 4       | 14                                         | 5                                                   | 7      | 10     | 12     | 14           | 18      |
| 11      | 11                                         | 8                                                   | 8      | 12     | 14     | 17           | 19      |
| 12      | 16                                         | 3                                                   | 3      | 4      | 9      | 13           | 18      |
| 13      | 16                                         | 6                                                   | 7      | 9      | 12     | 12           | 16      |
| 23      | 9                                          | 3                                                   | 5      | 6      | 9      | 11           | 13      |
| 26      | 11                                         | 3                                                   | 3      | 3      | 4      | 7            | 11      |
| 32      | 14                                         | 2                                                   | 3      | 5      | 8      | 12           | 15      |
| 35      | 10                                         | 3                                                   | 4      | 4      | 7      | 9            | 11      |
| 36      | 15                                         | 3                                                   | 6      | 10     | 11     | 14           | 17      |
| Average | <b>12.36</b>                               | 3.64                                                | 5.27   | 7.18   | 9.64   | <b>12.18</b> | 15.09   |

Size of a computed pocket, which is the closest to known ABS, was measured for different radius cutoffs. The complexes indices refer to Table 1. The size of ABS was measured as a number of rRNA nts it comprises. A radius of 9 Å was chosen due to the size similarity to known binding sites.

**Table S4:** Number of overlapping putative pockets in the small and the large ribosomal subunit

| PDB code | Organism               | No of pockets with a size of 12 nts |
|----------|------------------------|-------------------------------------|
| 1J5E     | <i>T. thermophilus</i> | 5,724                               |
| IJJ2     | <i>H. marismortui</i>  | 11,886                              |
| 2AVY     | <i>E. coli</i>         | 5,998                               |
| 2AW4     | <i>E. coli</i>         | 12,427                              |
| 2ZJR     | <i>D. radiodurans</i>  | 13,563                              |

Number of overlapping putative pockets, in the small and the large ribosomal subunit. The pockets differ from each other in at least one nt. The computed pockets were defined with a small probe radius of 1.5 Å (Table S1), large probe radius of 5.5 Å (Table S2) and a radius of 9 Å (Table S3) around the computed center of mass.

**Table S5:** Overlapping sensitivity and specificity between known ABSs and computed pockets.

| Index | Size of known binding site<br>[number of nts] | Size of putative pocket<br>[number of nts] | Common<br>[number of nts] | Percent<br>specificity | Percent<br>sensitivity |
|-------|-----------------------------------------------|--------------------------------------------|---------------------------|------------------------|------------------------|
| 1     | 12                                            | 12                                         | 12                        | 100.0                  | 100.0                  |
| 2     | 11                                            | 12                                         | 8                         | 72.7                   | 66.7                   |
| 3     | 9                                             | 12                                         | 8                         | 88.9                   | 66.7                   |
| 4     | 11                                            | 12                                         | 10                        | 90.9                   | 83.3                   |
| 5     | 12                                            | 12                                         | 11                        | 91.7                   | 91.7                   |
| 6     | 16                                            | 12                                         | 12                        | 75.0                   | 100.0                  |
| 7     | 13                                            | 12                                         | 11                        | 84.6                   | 91.7                   |
| 8     | 13                                            | 12                                         | 11                        | 84.6                   | 91.7                   |
| 9     | 11                                            | 12                                         | 9                         | 81.8                   | 75.0                   |
| 10    | 13                                            | 12                                         | 8                         | 61.5                   | 66.7                   |
| 11    | 14                                            | 12                                         | 12                        | 85.7                   | 100.0                  |
| 12    | 16                                            | 12                                         | 11                        | 68.8                   | 91.7                   |
| 13    | 16                                            | 12                                         | 12                        | 75.0                   | 100.0                  |
| 14    | 14                                            | 12                                         | 7                         | 50.0                   | 58.3                   |
| 15    | 12                                            | 12                                         | 12                        | 100.0                  | 100.0                  |
| 16    | 14                                            | 12                                         | 12                        | 85.7                   | 100.0                  |
| 17    | 16                                            | 12                                         | 8                         | 50.0                   | 66.7                   |
| 18    | 15                                            | 12                                         | 12                        | 80.0                   | 100.0                  |
| 19    | 18                                            | 12                                         | 12                        | 66.7                   | 100.0                  |
| 20    | 16                                            | 12                                         | 12                        | 75.0                   | 100.0                  |
| 21    | 16                                            | 12                                         | 12                        | 75.0                   | 100.0                  |
| 22    | 11                                            | 12                                         | 9                         | 81.8                   | 75.0                   |
| 23    | 10                                            | 12                                         | 8                         | 80.0                   | 66.7                   |
| 24    | 11                                            | 12                                         | 9                         | 81.8                   | 75.0                   |
| 25    | 18                                            | 12                                         | 9                         | 50.0                   | 75.0                   |
| 26    | 15                                            | 12                                         | 9                         | 60.0                   | 75.0                   |
| 27    | 14                                            | 12                                         | 11                        | 78.6                   | 91.7                   |
| 28    | 16                                            | 12                                         | 11                        | 68.8                   | 91.7                   |
| 29    | 16                                            | 12                                         | 12                        | 75.0                   | 100.0                  |
| 30    | 14                                            | 12                                         | 10                        | 71.4                   | 83.3                   |
| 31    | 20                                            | 12                                         | 11                        | 55.0                   | 91.7                   |
| 32    | 9                                             | 12                                         | 8                         | 88.9                   | 66.7                   |
| 33    | 8                                             | 12                                         | 8                         | 100.0                  | 66.7                   |
| 34    | 14                                            | 12                                         | 10                        | 71.4                   | 83.3                   |
| 35    | 14                                            | 12                                         | 12                        | 85.7                   | 100.0                  |
| 36    | 11                                            | 12                                         | 7                         | 63.6                   | 58.3                   |

|    |    |    |    |       |       |
|----|----|----|----|-------|-------|
| 37 | 16 | 12 | 12 | 75.0  | 100.0 |
| 38 | 17 | 12 | 12 | 70.6  | 100.0 |
| 39 | 15 | 12 | 11 | 73.3  | 91.7  |
| 40 | 14 | 12 | 11 | 78.6  | 91.7  |
| 41 | 7  | 12 | 7  | 100.0 | 58.3  |
| 42 | 6  | 12 | 6  | 100.0 | 50.0  |
| 43 | 14 | 12 | 10 | 71.4  | 83.3  |
| 44 | 16 | 12 | 11 | 68.8  | 91.7  |
| 45 | 15 | 12 | 11 | 73.3  | 91.7  |
| 46 | 18 | 12 | 11 | 61.1  | 91.7  |
| 47 | 14 | 12 | 11 | 78.6  | 91.7  |
| 48 | 14 | 12 | 9  | 64.3  | 75.0  |
| 49 | 5  | 12 | 4  | NA    | NA    |
| 50 | 21 | 12 | 10 | 47.6  | 83.3  |
| 51 | 17 | 12 | 9  | 52.9  | 75.0  |
| 52 | 19 | 12 | 10 | 52.6  | 83.3  |
| 53 | 15 | 12 | 11 | 73.3  | 91.7  |
| 54 | 9  | 12 | 7  | 77.8  | 58.3  |
| 55 | 17 | 12 | 9  | 52.9  | 75.0  |
| 56 | 13 | 12 | 9  | 69.2  | 75.0  |
| 57 | 5  | 12 | 5  | NA    | NA    |
| 58 | 11 | 12 | 9  | 81.8  | 75.0  |
| 59 | 14 | 12 | 10 | 71.4  | 83.3  |
| 60 | 12 | 12 | 9  | 75.0  | 75.0  |
| 61 | 14 | 12 | 10 | 71.4  | 83.3  |
| 62 | 20 | 12 | 10 | 50.0  | 83.3  |
| 63 | 17 | 12 | 10 | 58.8  | 83.3  |
| 64 | 15 | 12 | 9  | 60.0  | 75.0  |
| 65 | 15 | 12 | 9  | 60.0  | 75.0  |

Sensitivity and specificity were calculated for antibiotics binding sites that consists more than 5 nucleotides. *Overlapping specificity* equals to the fraction of the common nts in the putative and the known pockets divided by the number of nts in the known ABS, and *overlapping sensitivity* equals to the fraction of common nts divided by the number of nts included in the putative pocket. Indices refer to the known ABSs as presented in Table 1.

**Table S6:** List of studied properties

| Atomic level |      |     |      |     |                   |
|--------------|------|-----|------|-----|-------------------|
| 1.           | P4HO | 7.  | N3H0 | 13. | C3H0              |
| 2.           | O2H1 | 8.  | N2H0 | 14. | Base donor        |
| 3.           | O2H0 | 9.  | C4H2 | 15. | Base acceptor     |
| 4.           | O1H0 | 10. | C4H1 | 16. | Sugar oxygens     |
| 5.           | N3H2 | 11. | C3H1 | 17. | Phosphate oxygens |
| 6.           | N3H1 | 12. | C3H1 |     |                   |

| Nucleotide level |                         |     |                           |
|------------------|-------------------------|-----|---------------------------|
| 1.               | Base: A                 | 16. | Base pair: WW trans       |
| 2.               | Base: C                 | 17. | Base pair: WH cis         |
| 3.               | Base: G                 | 18. | Base pair: WH trans       |
| 4.               | Base: U                 | 19. | Base pair: HH cis         |
| 5.               | Sugar pucker: C1 exo    | 20. | Base pair: HH trans       |
| 6.               | Sugar pucker: C1 endo   | 21. | Base pair: HS cis         |
| 7.               | Sugar pucker: C2 exo    | 22. | Base pair: HS trans       |
| 8.               | Sugar pucker: C2 endo   | 23. | Base pair: SS cis         |
| 9.               | Sugar pucker: C3 exo    | 24. | Base pair: SS trans       |
| 10.              | Sugar pucker: C3 endo   | 25. | Base Stack: adjacent      |
| 11.              | Sugar pucker: C4 exo    | 26. | Base Stack: non- adjacent |
| 12.              | Sugar pucker: O4 endo   | 27. | Centrality: Closeness     |
| 13.              | Base conformation: syn  | 28. | Centrality: Betweenness   |
| 14.              | Base conformation: anti | 29. | Centrality: Degree        |
| 15.              | Base pair: WW cis       | 30. | Evolutionary conservation |

Abbreviations: W, Watson Crick; H, Hoogsteen; S, sugar edge.

**Table S7:** Summary of properties that are over and under represented in *T. thermophilus* and *H. marismortui* ABSs

| Over represented properties in binding site |                        |    |                      |                       |         |                      | Under represented properties |                        |    |                      |                       |         |                      |
|---------------------------------------------|------------------------|----|----------------------|-----------------------|---------|----------------------|------------------------------|------------------------|----|----------------------|-----------------------|---------|----------------------|
|                                             | <i>T. thermophilus</i> |    |                      | <i>H. marismortui</i> |         |                      |                              | <i>T. thermophilus</i> |    |                      | <i>H. marismortui</i> |         |                      |
| Property                                    | ABS                    | RP | Ligand Binding sites | ABS                   | RP      | Ligand Binding sites | Property                     | ABS                    | RP | Ligand Binding sites | ABS                   | RP      | Ligand Binding sites |
| Non-paired                                  | NS                     | NS | 1.3E-02              | 2.8E-05               | NS      | 2.1E-03              | WWcis                        | NS                     | NS | 9.6E-03              | 2.0E-03               | NS      | 2.1E-03              |
| <i>syn</i>                                  | NS                     | NS | 3.2E-02              | 5.1E-02               | NS      | NS                   | adjacent                     | NS                     | NS | NS                   | 1.6E-04               | 1.5E-03 | 3.2E-03              |
| WHcis                                       | 1.0E-03                | NS | NS                   | NS                    | NS      | NS                   | GC                           | 2.7E-02                | NS | NS                   | 5.2E-03               | NS      | 1.7E-02              |
| non-adjacent                                | NS                     | NS | NS                   | 4.9E-02               | 1.4E-02 | NS                   | UA                           | NS                     | NS | NS                   | 2.1E-02               | NS      | 8.1E-04              |
| UC                                          | NS                     | NS | NS                   | 4.2E-02               | NS      | NS                   |                              |                        |    |                      |                       |         |                      |

Abbreviations: RP, Ribosomal Proteins



**Table S8:** *p*-value table for structural properties that over and under represented in *T. thermophilus*, *H. marismortui* and *D. radiodurans* ABSs.

| Overrepresented properties |                        |                       |                       | Underrepresented properties |                        |                       |                       |
|----------------------------|------------------------|-----------------------|-----------------------|-----------------------------|------------------------|-----------------------|-----------------------|
|                            | <i>T. thermophilus</i> | <i>H. marismortui</i> | <i>D. radiodurans</i> |                             | <i>T. thermophilus</i> | <i>H. marismortui</i> | <i>D. radiodurans</i> |
| non-paired                 | NS                     | 2.83E-05              | 1.33E-03              | C3 endo                     | NS                     | NS                    | 9.89E-03              |
| <i>syn</i>                 | NS                     | 5.06E-02              | 2.79E-02              | WWcis                       | NS                     | 2.02E-03              | 3.64E-06              |
| WHcis                      | 1.09E-03               | NS                    | NS                    | adjacent                    | NS                     | 1.60E-04              | 1.52E-09              |
| non-adjacent               | NS                     | 4.93E-02              | NS                    |                             |                        |                       |                       |

Non significant (NS) refer to P-value>0.05

**Table S9:** A-minor motif elements in ABSs

| binding site index | Residue 1 |        |       | Residue 2 |        |       | Residue 3 |        |       |
|--------------------|-----------|--------|-------|-----------|--------|-------|-----------|--------|-------|
|                    | base      | number | chain | base      | number | chain | base      | number | chain |
| 1                  | A         | 1492   | A     | A         | 35     | Y     | U         | 20     | X     |
| 1,13               | A         | 1493   | A     | A         | 36     | Y     | U         | 19     | X     |
| 1,13               | A         | 1519   | A     | G         | 1497   | A     | C         | 1404   | A     |
| 2                  | A         | 696    | A     | C         | 796    | A     | G         | 786    | A     |
| 6                  | A         | 1169   | A     | G         | 1088   | A     | C         | 1097   | A     |
| 7                  | A         | 1375   | A     | C         | 1344   | A     | G         | 939    | A     |
| 8                  | A         | 282    | A     | G         | 247    | A     | C         | 277    | A     |
| 11                 | A         | 1191   | A     | G         | 1068   | A     | C         | 1107   | A     |
| 12                 | A         | 915    | A     | C         | 912    | A     | G         | 885    | A     |
| 24,25              | A         | 767    | 0     | G         | 2110   | 0     | C         | 2477   | 0     |

Binding sites indices refer to Table 1.

**Table S10:** Known sites and their computed DI

| Index | Antibiotics       | Organism | PDB  | Identifier | DI   |
|-------|-------------------|----------|------|------------|------|
| 1     | Hygromycin B      | T.t      | 1HNZ | HYG        | 0.29 |
| 2     | Pactamycin        | T.t      | 1HNX | PCY        | 0.46 |
| 3     | Tetracycline      | T.t      | 1HNW | TAC 1001   | 0.72 |
| 4     | Tetracycline      | T.t      | 1HNW | TAC 1002   | 0.59 |
| 5     | Tetracycline      | T.t      | 1I97 | TAC 2001   | 0.65 |
| 6     | Tetracycline      | T.t      | 1I97 | TAC 2003   | 0.34 |
| 7     | Tetracycline      | T.t      | 1I97 | TAC 2004   | 0.25 |
| 8     | Tetracycline      | T.t      | 1I97 | TAC 2005   | 0.40 |
| 9     | Tetracycline      | T.t      | 1I97 | TAC 2006   | 0.55 |
| 10    | Edeine            | T.t      | 1I95 | EDE        | 0.47 |
| 11    | Spectinomycin     | T.t      | 1FJG | SCM        | 0.34 |
| 12    | Streptomycin      | T.t      | 1FJG | SRY        | 0.39 |
| 13    | Paromomycin       | T.t      | 1FJG | PAR        | 0.29 |
| 14    | Kasugamycin       | T.t      | 2HHH | KSG        | 0.61 |
| 22    | Erythromycin      | H.m      | 1YI2 | ERY        | 0.86 |
| 23    | Azithromycin      | H.m      | 1YHQ | ZIT        | 0.95 |
| 24    | Telithromycin     | H.m      | 1YIJ | TEL        | 0.86 |
| 25    | Quinupristin      | H.m      | 1YJW | SYB        | 0.95 |
| 26    | Virginiamycin S   | H.m      | 1YIT | VRS        | 0.95 |
| 27    | Virginiamycin M   | H.m      | 1YIT | VIR        | 0.95 |
| 28    | Clindamycin       | H.m      | 1YJN | CLY        | 0.86 |
| 29    | Carbomycin        | H.m      | 1K8A | CAI        | 0.91 |
| 30    | Spiramycin        | H.m      | 1KD1 | SPR        | 0.91 |
| 31    | Tylosin           | H.m      | 1K9M | TYK        | 0.86 |
| 32    | Sparsomycin       | H.m      | 1M90 | SPS        | 0.76 |
| 33    | Chloramphenicol   | H.m      | 1NJI | CLM        | 0.95 |
| 34    | Anisomycin        | H.m      | 1K73 | ANM        | 0.98 |
| 35    | Blasticidin S     | H.m      | 1KC8 | BLS 9001   | 0.59 |
| 36    | Blasticidin S     | H.m      | 1KC8 | BLS 9002   | 0.44 |
| 37    | Homoharringtonine | H.m      | 3G6E | HMT        | 0.91 |
| 38    | Bruceantin        | H.m      | 3G71 | WIN        | 0.89 |
| 39    | Tiamulin          | H.m      | 3G4S | MUL        | 0.91 |
| 40    | Oxazolidinone     | H.m      | 3CXC | SLD        | 0.88 |
| 41    | Girodazole        | H.m      | 2OTL | GIR        | 0.59 |
| 42    | 13-deoxytedanolid | H.m      | 2OTJ | 13T        | 0.61 |

The DI was calculated for the computed pocket with the highest degree of overlap.
