# Supplementary material for: Structural signatures of antibiotic binding sites on the ribosome
Source: PubMed Central journal article supplement — Nucleic Acids Res. 2010 May 21;38(18):5982–94. doi: 10.1093/nar/gkq411 (PMC2952860; doi:10.1093/nar/gkq411), 2010-05-21
Supplement: supp_gkq411_Supplementary_Figure.pdf [file supp_gkq411_Supplementary_Figure.pdf]

## Supplementary Figure

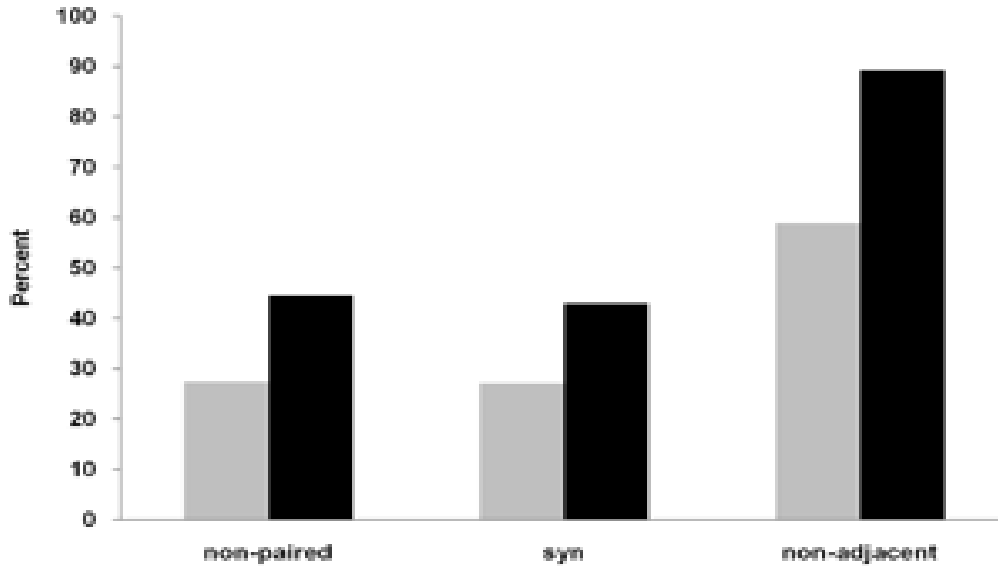

**Figure S1.** Conservation of the structural properties of *E.coli* (19) and *T. thermophilus* (31) 23S rRNA. The percent of conserved non-adjacent, syn and non-paired nts in both structures is presented. As illustrated, non-paired bases ( $p$ -value=3.54E-002) and non-adjacent base-base stacking ( $p$ -value=9.14E-005) are significantly conserved in ABSs.
